# Supplementary material for: Mitigating the Harmful Impact of Ageism among Older Individuals: The Buffering Role of Resilience Factors
Source: MDPI journal article supplement (doi:10.3390/geriatrics9010001), 2023-12-20
Supplement: s1 [file Supplement S2.pdf › Supplement S2.pdf]

**Supplement B: Mitigating the Harmful Impact of Ageism Among Older Individuals: the Buffering Role of Resilience Factors.**

**Table S3**

*Moderation Effects of the Relationship between Perceived Negative Ageism and Several Outcome Variables*

| Outcome           | Predictor | <i>b</i> | 95% CI         | SE   | <i>t</i> | beta  |
|-------------------|-----------|----------|----------------|------|----------|-------|
| Quality of life   |           | 135.5*** | [123.9, 147.1] | 5.92 | 22.9     |       |
|                   | PNA       | -4.23*** | [-5.68, -2.78] | 0.74 | -5.72    | -1.16 |
|                   | Age       | -0.48*** | [-0.65, -0.31] | 0.09 | -5.51    | -0.35 |
|                   | PNA:Age   | 0.05***  | [0.02, 0.07]   | 0.01 | 4.26     | 0.95  |
| Mental well-being |           | 67.03*** | [59.6, 74.5]   | 3.79 | 17.7     |       |
|                   | PNA       | -1.95*** | [-2.88, -1.03] | 0.47 | -4.13    | -0.88 |
|                   | Age       | -0.12*   | [-0.22, -0.01] | 0.06 | -2.09    | -0.14 |
|                   | PNA:Age   | 0.02**   | [0.01, 0.03]   | 0.01 | 3.18     | 0.74  |
| Depression        |           | 11.87*** | [6.18, 17.6]   | 2.90 | 4.09     |       |
|                   | PNA       | 0.77*    | [0.06, 1.48]   | 0.36 | 2.12     | 0.45  |
|                   | Age       | 0.02     | [-0.07, 0.10]  | 0.04 | 0.38     | 0.02  |
|                   | PNA:Age   | -0.01    | [-0.02, 0.00]  | 0.01 | -1.06    | -0.25 |
| Loneliness        |           | -2.71    | [-6.54, 1.12]  | 1.95 | -1.39    |       |
|                   | PNA       | 0.64**   | [0.16, 1.12]   | 0.24 | 2.64     | 0.56  |
|                   | Age       | 0.05     | [-0.01, 0.11]  | 0.03 | 1.76     | 0.11  |
|                   | PNA:Age   | -0.01    | [-0.01, 0.00]  | 0.00 | -1.55    | -0.36 |

*Note.* *b* represents unstandardized regression weights or estimated marginal trends (for the simple slopes, following on significant interaction terms). Square brackets are used to enclose the lower and upper limits of a confidence interval (CI), and both the standard error (SE) and *t*-value are reported. \**p* < .05, \*\**p* < .01, \*\*\**p* < .001. In case the moderation term is insignificant, the main effect should not be interpreted. Please see Table 1 (main text) for the bivariate correlation.
